# Supplementary material for: Treatment of Polluted Urban Surface Waters by Sponge Based Aerobic Biofilm Reactor: Purification Performances and Resilience
Source: Research Square preprint supplement (doi:10.21203/rs.3.rs-837749/v1), 2021-10-01
Supplement: Supplementary file 1 [file 6fffc892d4d2c7550f80d2be.docx]

Supporting information for

**Treatment of polluted urban surface waters by sponge based aerobic biofilm reactor: Purification performances and resilience**

Shangwei He a,b, Na Songa, Zongbao Yao a, Helong Jiang a*

1. State Key Laboratory of Lake Science and Environment, Nanjing Institute of Geography and Limnology, Chinese Academy of Sciences, Nanjing 210008, China
2. University of Chinese Academy of Sciences, Beijing 100049, China

Corresponding author: Nanjing Institute of Geography and Limnology, Chinese Academy of Sciences, 73 East Beijing Road, Nanjing 210008, China.

E-mail address: hljiang@niglas.ac.cn

There are 4 pages in this SI, containing 3 figures.


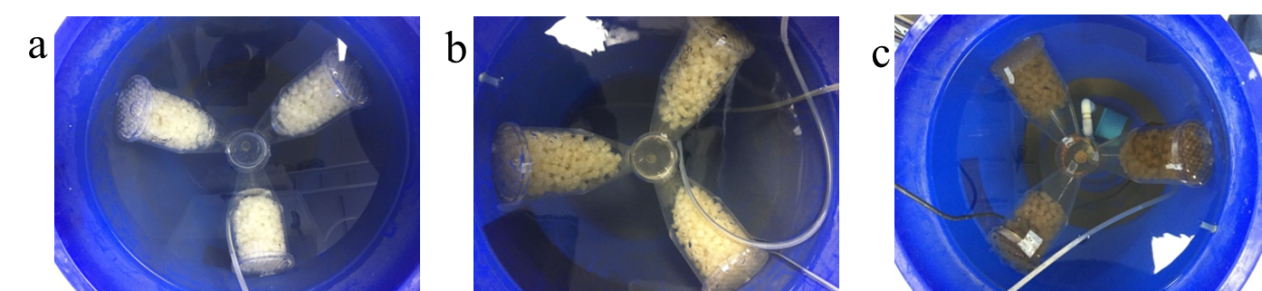


**Fig. S1** Appearances of the biofilms attached on polyurethane sponges in SABR at different times. (a) 0 day; (b) 20th days; (c) 100th days (Only filling ratio by 80% were present.)

**Fig. S2** Water qualities in continuous experiments by SABRs (Filling ratios by 20%, 40%, 60%, 80% were referred to as FR20, FR40, FR60, and FR80, respectively).

**Fig. S3** Purification performances of SABRs in stageⅤ(TOC were 59.56±3.09 mg L-1 at the beginning of the experiment. Filling ratios by 20%, 40%, 60%, 80% were referred to as FR20, FR40, FR60 and FR80, respectively).
